# Supplementary material
Source: publisher site journal article supplement (https://www.spandidos-publications.com/4202/downloadSupplementary)
Supplement: Supplementary file 1 [file downloadSupplementary]

## Sheet: Sheet1
Table SIV. MiRNAs targeted the differentally expressed cancer-related genes.
Target Score	miRNA Name	Gene ID	Gene Symbol	Transcript Accession	Gene Description
93	mmu-miR-138-5p	241638	Lzts3	NM_197945	leucine zipper, putative tumor suppressor family member 3
81	mmu-miR-145a-5p	18383	Tnfrsf11b	NM_008764	tumor necrosis factor receptor superfamily, member 11b (osteoprotegerin)
71	mmu-miR-145a-5p	68145	Etaa1	NM_026576	Ewing tumor-associated antigen 1
66	mmu-miR-138-5p	77521	Mtus2	NM_029920	microtubule associated tumor suppressor candidate 2
66	mmu-miR-145a-5p	239126	C1qtnf9	NM_183175	C1q and tumor necrosis factor related protein 9
98	mmu-miR-204-5p	106869	Tnfaip8	NM_001177760	tumor necrosis factor, alpha-induced protein 8
98	mmu-miR-211-5p	106869	Tnfaip8	NM_001177760	tumor necrosis factor, alpha-induced protein 8
86	mmu-miR-204-5p	81799	C1qtnf3	NM_001204134	C1q and tumor necrosis factor related protein 3
86	mmu-miR-211-5p	81799	C1qtnf3	NM_001204134	C1q and tumor necrosis factor related protein 3
85	mmu-miR-204-5p	50523	Lats2	NM_015771	large tumor suppressor 2
85	mmu-miR-211-5p	50523	Lats2	NM_015771	large tumor suppressor 2
72	mmu-miR-204-5p	16798	Lats1	NM_010690	large tumor suppressor
72	mmu-miR-211-5p	16798	Lats1	NM_010690	large tumor suppressor
71	mmu-miR-201-5p	16798	Lats1	NM_010690	large tumor suppressor
60	mmu-miR-204-5p	64213	St7	NM_022332	suppression of tumorigenicity 7
60	mmu-miR-216a-5p	18383	Tnfrsf11b	NM_008764	tumor necrosis factor receptor superfamily, member 11b (osteoprotegerin)
60	mmu-miR-211-5p	64213	St7	NM_022332	suppression of tumorigenicity 7
89	mmu-miR-31-5p	50523	Lats2	NM_015771	large tumor suppressor 2
87	mmu-miR-31-5p	243842	Gltscr1	NM_001081418	glioma tumor suppressor candidate region gene 1
82	mmu-miR-31-5p	246257	Ovca2	NM_027136	candidate tumor suppressor in ovarian cancer 2
63	mmu-miR-326-3p	226154	Lzts2	NM_001130526	leucine zipper, putative tumor suppressor 2
61	mmu-miR-31-5p	72709	C1qtnf6	NM_028331	C1q and tumor necrosis factor related protein 6
60	mmu-miR-326-3p	246257	Ovca2	NM_027136	candidate tumor suppressor in ovarian cancer 2
98	mmu-miR-429-3p	50523	Lats2	NM_015771	large tumor suppressor 2
92	mmu-miR-429-3p	94217	Lrp1b	NM_053011	low density lipoprotein-related protein 1B (deleted in tumors)
80	mmu-miR-434-3p	22088	Tsg101	NM_021884	tumor susceptibility gene 101
73	mmu-miR-504-5p	80385	Tusc2	NM_019742	tumor suppressor candidate 2
66	mmu-miR-504-5p	18087	Nktr	NM_010918	natural killer tumor recognition sequence
65	mmu-miR-429-3p	102103	Mtus1	NM_001286413	mitochondrial tumor suppressor 1
64	mmu-miR-429-3p	18383	Tnfrsf11b	NM_008764	tumor necrosis factor receptor superfamily, member 11b (osteoprotegerin)
95	mmu-miR-668-3p	270120	Fat3	NM_001080814	FAT tumor suppressor homolog 3 (Drosophila)
90	mmu-miR-96-5p	21938	Tnfrsf1b	NM_011610	tumor necrosis factor receptor superfamily, member 1b
82	mmu-miR-96-5p	64213	St7	NM_022332	suppression of tumorigenicity 7
70	mmu-miR-874-3p	17965	Nbl1	NM_008675	neuroblastoma, suppression of tumorigenicity 1
66	mmu-miR-874-3p	76954	St5	NM_001001326	suppression of tumorigenicity 5
63	mmu-miR-874-3p	22431	Wt1	NM_144783	Wilms tumor 1 homolog
87	mmu-miR-125b-5p	22164	Tnfsf4	NM_009452	tumor necrosis factor (ligand) superfamily, member 4
87	mmu-miR-125a-5p	22164	Tnfsf4	NM_009452	tumor necrosis factor (ligand) superfamily, member 4
85	mmu-miR-135a-5p	50523	Lats2	NM_015771	large tumor suppressor 2
81	mmu-miR-125b-5p	102103	Mtus1	NM_001286413	mitochondrial tumor suppressor 1
81	mmu-miR-125a-5p	102103	Mtus1	NM_001286413	mitochondrial tumor suppressor 1
81	mmu-miR-107-3p	16798	Lats1	NM_010690	large tumor suppressor
77	mmu-miR-135a-5p	102103	Mtus1	NM_001286413	mitochondrial tumor suppressor 1
64	mmu-miR-107-3p	270120	Fat3	NM_001080814	FAT tumor suppressor homolog 3 (Drosophila)
62	mmu-miR-107-3p	21927	Tnfaip1	NM_001159392	tumor necrosis factor, alpha-induced protein 1 (endothelial)
